# Supplementary material for: Safe and Efficient Sigma1 Ligand: A Potential Drug Candidate for Multiple Sclerosis
Source: MDPI journal article supplement (doi:10.3390/ijms231911893), 2022-10-06
Supplement: s1 [file s1]

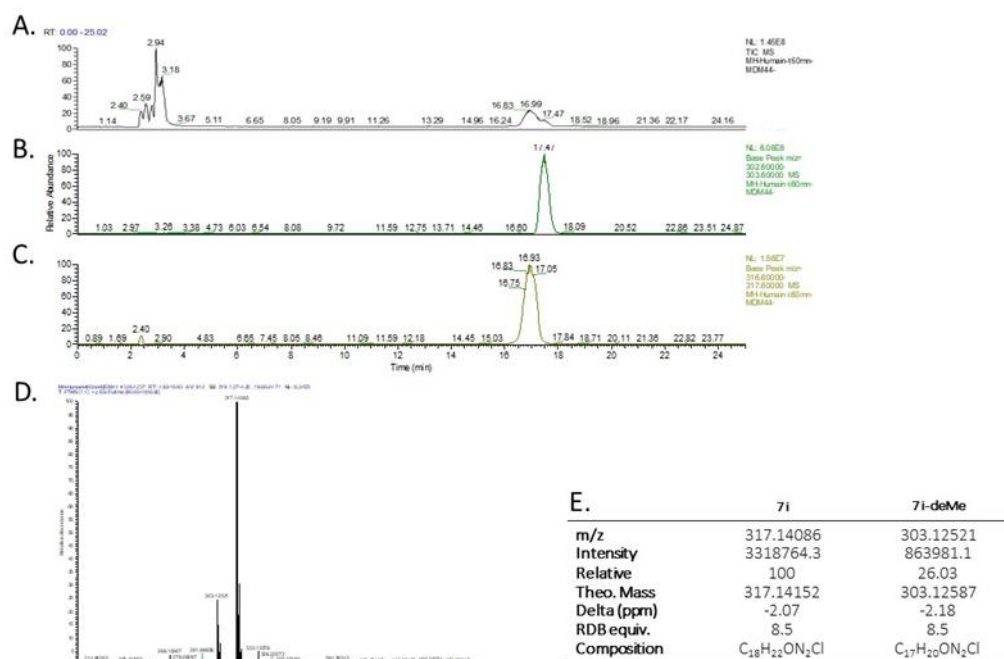

**Figure S1.** Metabolite identification and profiling. Chromatographic separation of compound **7i** and its major metabolite (panel A) obtained from human liver microsomes after 1h incubation. Base peak of the demethylated compound **7i-deMe** (panel B) ( $m/z = 303.12521$ ) and of the compound **7i** (panel C) ( $m/z = 317.14086$ ). Mass spectra validation (panel D) and characteristics of the compounds (panel E).

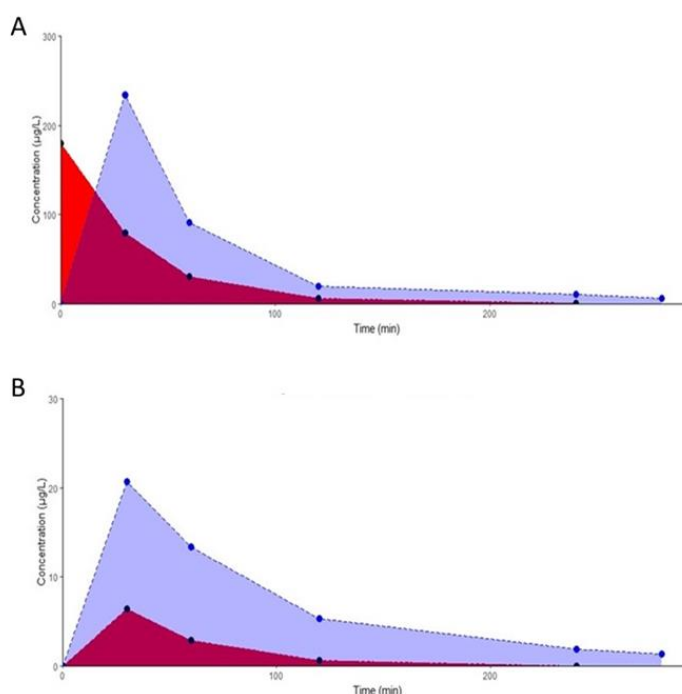

**Figure S2.** Compound **7i** kinetics after i.v (panel A) and p.o (panel B) administration. Compound **7i** was administrated at 1mg/kg. Analyses were performed in plasma (red) and brain homogenates (blue). Data are presented as median of  $n=3$  mice per time-point. Simulations were performed to define time 0 to 30 min evolution.

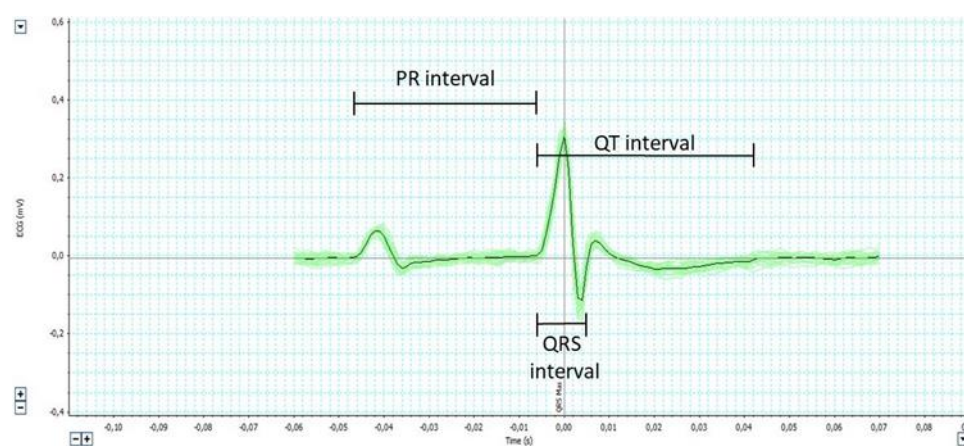

**Figure S3.** Normal ECG trace for single cardiac cycle. The PR interval represents the period extending from the beginning of the P wave until the beginning of the QRS complex. The QRS interval represents depolarization. The QT interval represents the time between initial depolarization and final repolarization.
